# Supplementary material for: Connecting quantum dots and bionanoparticles in hybrid nanoscale ultra-thin films
Source: Royal Society of Chemistry journal article supplement (doi:10.1039/b807757f), 2009-01-01
Supplement: b807757f.pdf [file b807757f.pdf]

Supporting information for:

## Connecting quantum dots and bionanoparticles in hybrid nanoscale ultra-thin films

Ravisubhash Tangirala, Yunxia Hu, Maisie Joralemon, Qingling Zhang, Jinbo He, Thomas P. Russell\* and Todd Emrick\*

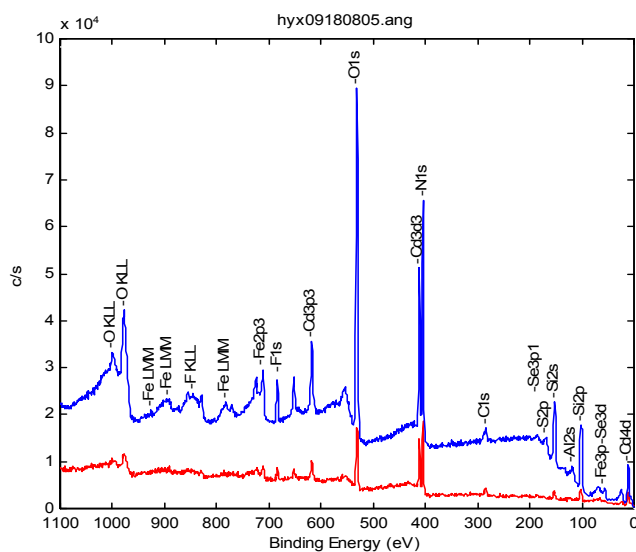

**Figure S1.** XPS spectra recorded on a CdSe/ferritin cross-linked film prepared by assembly of benzaldehyde-functionalized CdSe quantum dots and ferritin nanoparticles at a flat toluene-water interface, showing the presence of Cd, Se, Fe and N. The analysis was performed after etching the sample with oxygen plasma to remove carbon.

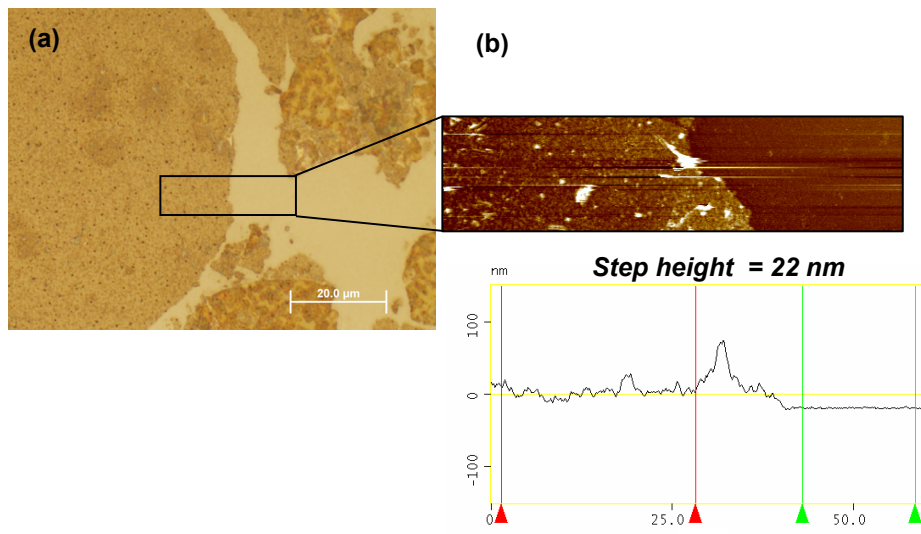

**Figure S2.** (a) Optical micrograph of a crosslinked CdSe/ferritin film; (b) AFM image of the same film, showing a thickness of 22 nm.

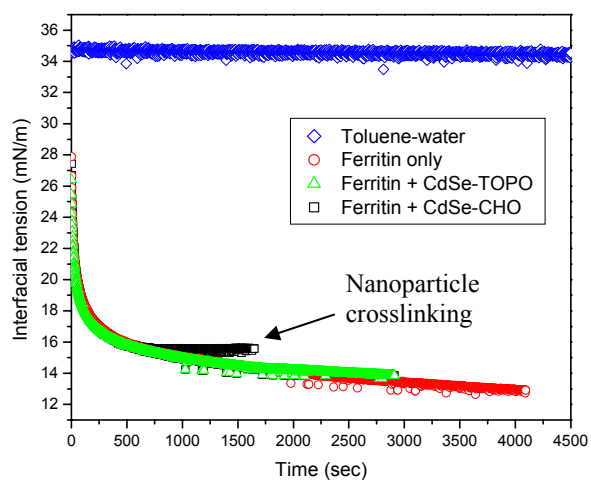

**Figure S3.** Pendant drop tensiometry results from nanoparticle assemblies and cross-linked assemblies.

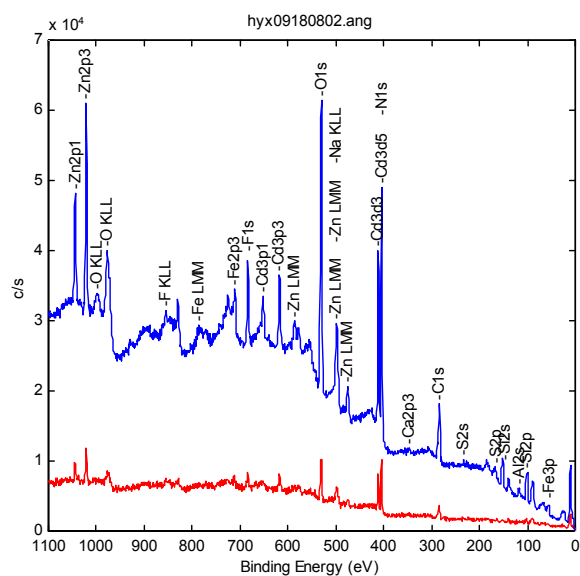

**Figure S4.** XPS spectrum of a plasma-etched film containing norbornene-functionalized CdSe/ZnS quantum dots and ferritin nanoparticles, following crosslinking by ROMP. Peaks corresponding to Cd, Se, Zn, Fe and N confirm the presence of both types of nanoparticles.

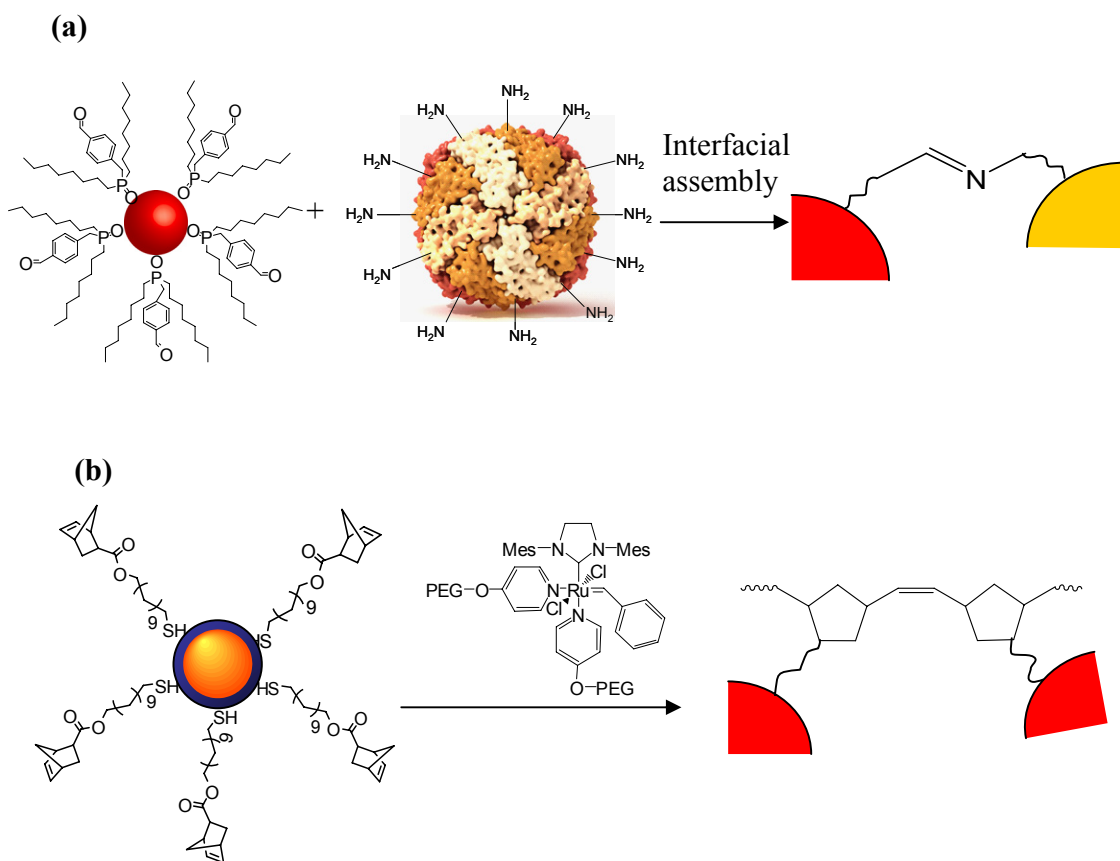

**Figure S5.** Depiction of interparticle reactions that cross-link nanoparticle assemblies, using (a) imine formation and (b) ROMP to bridge the assembled particles.
